1 **Title:** The relationship between wild-type transthyretin amyloid load and ligamentum flavum  
2 thickness in lumbar stenosis patients

3  
4 **Authors:** Andy Y. Wang, A.B.<sup>a</sup>; Harleen Saini, M.S.<sup>a</sup>; Joseph N. Tingen, B.S.<sup>a</sup>; Vaishnavi  
5 Sharma, B.A.<sup>a</sup>; Alexandra Flores, B.S.<sup>a</sup>; Diang Liu, M.S.<sup>a</sup>; Michelle Olmos, B.A.<sup>a</sup>; Ellen D.  
6 McPhail, M.D.<sup>b</sup>; Mina G. Safain, M.D.<sup>a</sup>; James Kryzanski, M.D.<sup>a</sup>; Knarik Arkun, M.D.<sup>c,a</sup>; Ron I.  
7 Riesenburger, M.D.<sup>a</sup>

8  
9 **Affiliations:** <sup>a</sup>Department of Neurosurgery, Tufts Medical Center, Boston, Massachusetts, USA  
10 <sup>b</sup>Department of Laboratory Medicine and Pathology, Mayo Clinic, Rochester, Minnesota, USA  
11 <sup>c</sup>Department of Pathology and Laboratory Medicine, Tufts Medical Center, Boston,  
12 Massachusetts, USA

13  
14 **Corresponding author:**

15 Ron I. Riesenburger  
16 Department of Neurosurgery  
17 Tufts Medical Center  
18 800 Washington St, Boston, MA 02111, USA  
19 Email: rriesenburger@tuftsmedicalcenter.org

20  
21 **Key words:** wild-type transthyretin amyloid; lumbar ligamentum flavum burden; ligamentum  
22 flavum; thickness; amyloid load; machine learning; Trainable Weka Segmentation

23 **Short title:** Amyloid and ligamentum flavum thickness

24 **ABSTRACT**

25 **Background:** One key contributor to lumbar stenosis is thickening of the ligamentum flavum  
26 (LF), a process still poorly understood. Wild-type transthyretin amyloid (ATTRwt) has been  
27 found in the LF of patients undergoing decompression surgery, suggesting that amyloid may play  
28 a role. However, it is unclear whether within patients harboring ATTRwt, the amount of amyloid  
29 is associated with LF thickness.

30 **Methods:** From an initial cohort of 324 consecutive lumbar stenosis patients whose LF  
31 specimens from decompression surgery were sent for analysis (2018-2019), 33 patients met the  
32 following criteria: (1) Congo red-positive amyloid in the LF; (2) ATTRwt by mass spectrometry-  
33 based proteomics; and (3) an available preoperative MRI. Histological specimens were digitized,  
34 and amyloid load quantified through Trainable Weka Segmentation (TWS) machine learning. LF  
35 thicknesses were manually measured on axial T2-weighted preoperative MRI scans at each  
36 lumbar level, L1-S1. The sum of thicknesses at every lumbar LF level (L1-S1) equals “lumbar  
37 LF burden.”

38 **Results:** Patients had a mean age of 72.7 years (range 59-87), were mostly male (61%) and white  
39 (82%); and predominantly had surgery at L4-L5 levels (73%). Amyloid load was positively  
40 correlated with LF thickness ( $R=0.345$ ,  $p=0.0492$ ) at the levels of surgical decompression.  
41 Furthermore, amyloid load was positively correlated with lumbar LF burden ( $R=0.383$ ,  
42  $p=0.0279$ ).

43 **Conclusions:** Amyloid load is positively correlated with LF thickness and lumbar LF burden  
44 across all lumbar levels, in a dose-dependent manner. Further studies are needed to validate these  
45 findings, uncover the underlying pathophysiology, and pave the way towards using therapies that  
46 slow LF thickening.

47

48 **Keywords:** wild-type transthyretin amyloid; lumbar ligamentum flavum burden; ligamentum  
49 flavum; thickness; amyloid load; machine learning; Trainable Weka Segmentation

50

51

## 52 **INTRODUCTION**

53 Lumbar stenosis is one of the most common spine disorders afflicting older patients, and one key  
54 pathophysiological contributor is thickening of the ligamentum flavum (LF). Despite the  
55 ubiquity of lumbar stenosis, the underlying pathophysiological process is still poorly  
56 understood.<sup>1</sup> There has been increasing interest in the role of amyloid, misfolded protein  
57 aggregates that commonly deposit in the ligamentum flavum of older individuals.<sup>2, 3</sup> The amyloid  
58 deposited in LF is almost exclusively wild-type transthyretin amyloid (ATTRwt), a type derived  
59 from wild-type transthyretin precursor protein. ATTRwt is also found as a form of systemic  
60 amyloidosis. Many diagnosed ATTRwt patients present with heart failure due to cardiac  
61 amyloidosis, and many of these patients have an antecedent history of carpal tunnel syndrome.<sup>4</sup>  
62 Recent research has suggested that patients with ATTRwt amyloidosis may also present with an  
63 antecedent history of lumbar stenosis, with amyloid deposition in the LF hypothesized as  
64 possibly leading to its thickening.<sup>3, 5-8</sup> As ATTRwt is found in the LF of many older individuals  
65 who ultimately do not develop cardiac amyloidosis, it may be of interest outside of systemic  
66 amyloidosis as a factor in the pathophysiology of lumbar stenosis.

67

68 Our group has previously reported that lumbar stenosis patients harboring ATTRwt in their LF  
69 have thicker LF at the symptomatic level that required surgery, when compared to stenosis

70 patients without ATTRwt.<sup>9</sup> Subsequent analysis inclusive of asymptomatic lumbar levels also  
71 revealed an increased LF thickness in all lumbar levels when harboring ATTRwt.<sup>10</sup> This total  
72 sum of lumbar LF thicknesses is termed lumbar LF burden. These studies demonstrate that the  
73 presence of ATTRwt in the LF is associated with an increase in LF thickness, when compared to  
74 lumbar stenosis patients who do not harbor ATTRwt. However, it is still unclear whether within  
75 patients harboring ATTRwt, whether the amount of amyloid is associated with a dose-dependent  
76 increase in thickness. Only one previous paper studied this, reporting a strong relationship  
77 between the transthyretin amyloid load and LF thickness.<sup>8</sup> However, their method of quantifying  
78 amyloid deposits in histological specimens of ligamentum flavum acquired from lumbar  
79 decompression was not explained.

80

81 In this study, we aim to explore the relationship between transthyretin amyloid load and LF  
82 thickness in lumbar stenosis patients harboring ATTRwt through a precise machine learning  
83 quantification method. We have previously described this method as superior to existing  
84 methods that are subjective and non-reproducible.<sup>11</sup> Through exploring the relationship between  
85 amyloid load and LF thickness, we hope to elucidate the role that ATTRwt deposition in LF has  
86 in LF thickening and lumbar stenosis.

87

## 88 **MATERIALS AND METHODS**

### 89 *Patient selection*

90 Between 2018–2019, we investigated 324 consecutive patients who underwent decompression  
91 surgery for lumbar stenosis. Inclusion in the study required meeting the following criteria: (1) LF  
92 specimen that contained Congo red-positive amyloid; (2) ATTRwt amyloid by mass

93 spectrometry-based proteomics; and (3) an available preoperative MRI. Each LF specimen was  
94 stained with Congo red for apple-green birefringence under polarized light. The Congo red-  
95 positive amyloid deposits were typed by liquid chromatography tandem mass spectrometry (LC-  
96 MS/MS, Mayo Clinic Laboratories, Rochester, MN, USA) using previously published  
97 methods.<sup>12</sup> By LC-MS/MS, all specimens were of ATTR type, and all lacked mutant peptides  
98 indicative of pathogenic mutations and thus were consistent with ATTRwt. Out of this entire  
99 cohort, 33 patients met the above criteria. Since some patients had multiple specimens stained,  
100 we include 46 LF histology slides in this paper. Congo red stained slides were scanned and  
101 digitized using VENTANA DP 200 slide scanner (Roche Diagnostics, Rotkreuz, Switzerland) at  
102 a 20x magnification and 1 focus layer.

103

#### 104 *Amyloid Quantification*

105 Amyloid deposits were quantified through the Trainable Weka Segmentation (TWS) plugin  
106 through Fiji/ImageJ as previously described.<sup>11</sup> This machine learning segmentation method  
107 utilized small sets of human-directed annotations to learn and recognize characteristics of  
108 amyloid deposits. Classes of interest were selected to include amyloid, glass slide, calcifications,  
109 and tissue (Figure 1A). User-directed annotations on the digital specimens provided training data  
110 provided training data for TWS to build a classifier to recognize each of these classes,  
111 particularly the amyloid deposits (Figure 1B, 1C). The classifier was trained on 15 total  
112 specimens, each building upon the previous set of training data. Any additional annotation was  
113 added due to suboptimal amyloid recognition from application of the previous classifier. The  
114 final trained classifier was then applied all specimens without further annotations, including the  
115 initial specimens used to train the classifier. The TWS segmentation results were visually

116 inspected for appropriate fit to the original images by three researchers. To calculate amyloid  
117 load in each sample, the amyloid pixel count was divided by the sum of the amyloid,  
118 calcifications, and tissue pixel counts (Figure 1E). When a patient had multiple specimens, the  
119 amyloid load of all available slides was quantified, and the arithmetic mean reported.  
120

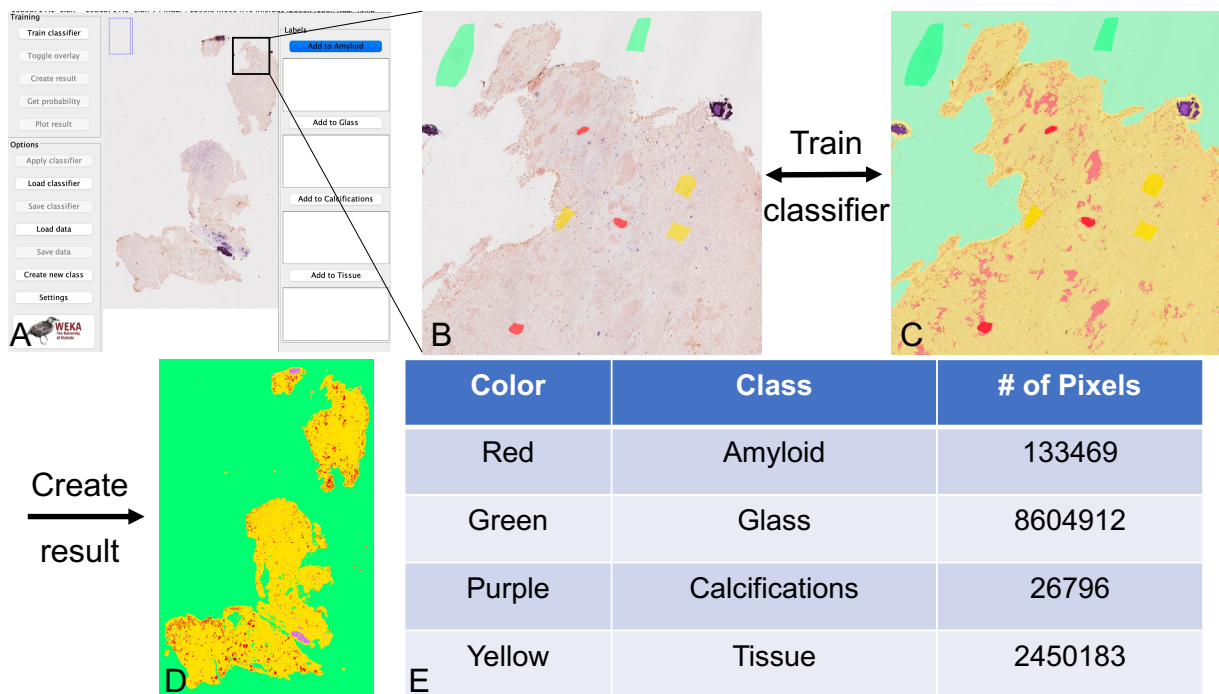

121  
122 **Figure 1. Quantification with TWS.** A) A digitized image of the ligamentum flavum specimen  
123 is imported into Fiji and opened within the TWS graphical user interface. B) Manual annotations  
124 are drawn that correspond to each class of interest. C) The classifier is then trained to learn the  
125 characteristics of each class through these annotations and segments the rest of the image. An  
126 overlay is generated for the user to inspect the fit of the segmentation to the original image.  
127 Additional annotations may be added or prior annotations removed, re-training the algorithm as  
128 necessary until reaching desired fit. D) After satisfactory fit with the overlay, a final image is

129 generated that assigns the pixels of each class to different colors. E) Calculation of the numbers  
130 of pixels in each class then allows for quantification of the total area of each component.

131

### 132 *Ligamentum flavum thickness measurements*

133 Preoperative axial T2-weighted MRI scans were used to measure LF thickness at all lumbar  
134 levels (L1-S1). A sagittal view was used to localize the lumbar level involved, and LF thickness  
135 was measured in the MRI viewer at the facet joint of the lumbar level as previously described in  
136 Sakamaki et al.<sup>13</sup> An example of how we quantified LF thickness is illustrated in Figure 2,  
137 showing perpendicular measurements at the edge of the inferior articular process of the facet  
138 joint. LF thickness was measured bilaterally at each level by measuring tools within the MRI  
139 viewer, and the arithmetic mean was recorded. Lumbar LF burden is calculated as the sum of  
140 mean LF thicknesses across all lumbar levels from L1-L2 to L5-S1. Two reviewers (who were  
141 uninvolved in the histological assessment of amyloid load) manually measured all specimens and  
142 were unaware of amyloid status. To assess inter-observer reliability, we generated an intraclass  
143 coefficient (ICC).<sup>14</sup> Sample sizes for inter-rater reliability were determined using Walter et al.  
144 and Zou methods for estimations with  $\rho_0 = 0.6$  assumed for minimal acceptable value of  
145 reliability,<sup>15, 16</sup> and calculations were carried out using a subset of 34 measurements. The ICC  
146 was found to be 0.89 ( $p < 0.0001$ , 95% CI 0.80–0.93), using ICC3. This finding is consistent  
147 with good inter-rater reliability (good: 0.75–0.9; excellent:  $> 0.9$ ).

148

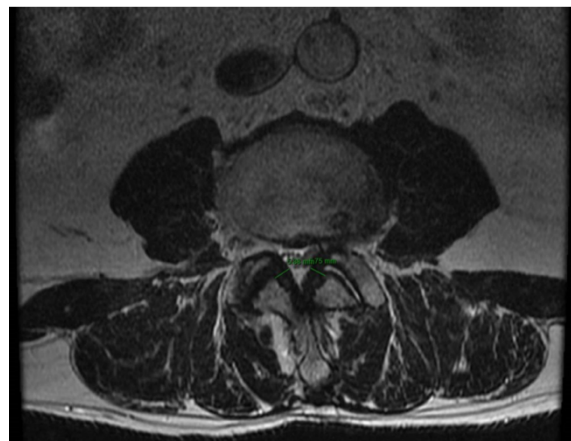

149

150 **Figure 2.** Example of LF thickness measurement on preoperative T2-weighted MRI.

151

### 152 *Statistical Analysis*

153 Statistical analysis was conducted using R version 4.1.1 and figures were produced using the  
154 package *ggpubr*. Pearson correlation assessed the correlation between amyloid load and  
155 ligamentum flavum thickness, as well as between amyloid load and lumbar LF burden. A p-value  
156  $< 0.05$  was considered statistically significant.

157

### 158 **RESULTS**

159 Baseline patient characteristics are listed in Table 1. The mean age of patients was 72.7 years  
160 old, with a standard deviation of 7.2 years (range 59-87). There was a preponderance of males  
161 (20 males vs 13 females). Most patients were white (82%). The level of decompression surgery,  
162 which could involve more than one level, showed a predominance at L4-L5 (73%).

163

164

**Table 1.** Baseline characteristics



| <b>Variable</b>         | <b>Patients</b><br>N = 33 <sup>1</sup> |
|-------------------------|----------------------------------------|
| <b>Age</b>              | 72.7 (7.2)                             |
| <b>Sex</b>              |                                        |
| F                       | 13 (39%)                               |
| M                       | 20 (61%)                               |
| <b>BMI</b>              | 29.7 (5.1)                             |
| <b>Level of Surgery</b> |                                        |
| L1-L2                   | 4 (12%)                                |
| L2-L3                   | 8 (24%)                                |
| L3-L4                   | 13 (39%)                               |
| L4-L5                   | 24 (73%)                               |
| L5-S1                   | 5 (15%)                                |
| <b>Race</b>             |                                        |
| Asian                   | 4 (12%)                                |
| African American        | 1 (3.0%)                               |
| Hispanic                | 1 (3.0%)                               |
| White                   | 27 (82%)                               |

<sup>1</sup>Mean (SD); n (%)

165

166 The percentage of amyloid load was calculated for each specimen, with a unimodal distribution  
167 and a peak between 3-4% (Figure 3A). LF thickness at the operative level was measured for each  
168 patient on preoperative MRIs, with the majority of thicknesses at similar levels between 3-7 mm  
169 (Figure 3B). The sum of all lumbar LF thicknesses, or “lumbar LF burden,” was calculated for  
170 each patient, and shown to have a bimodal distribution with peaks between 18-20 mm and  
171 between 26-28 mm (Figure 3C).

172

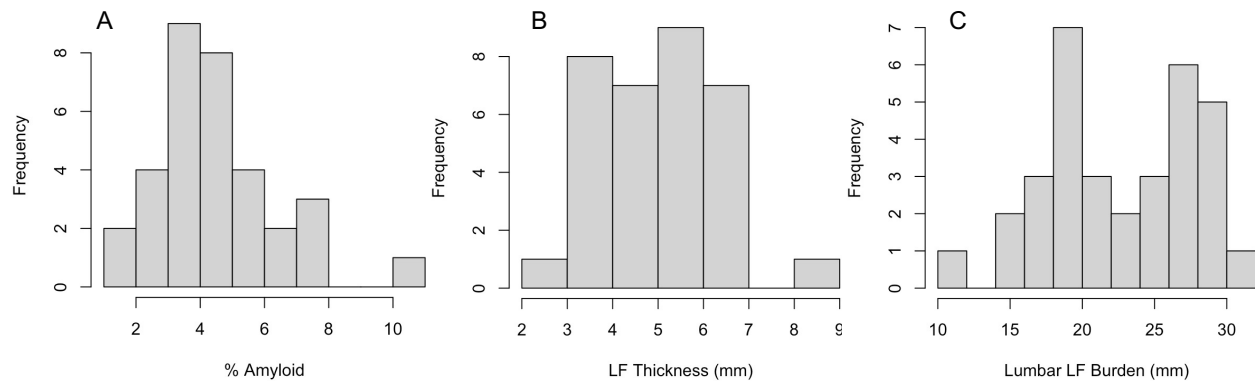

173

174 **Figure 3.** Histograms of A) amyloid load, B) LF thickness at the operative level, and C) lumbar  
175 LF burden.

176

177 A scatter plot of amyloid load and LF thickness at the surgical level is presented in Figure 4A.

178 Amyloid load was shown to be positively correlated with LF thickness, achieving statistical  
179 significance ( $R = 0.345$ ,  $p = 0.0492$ ). Ligamentum flavum thickness was also measured between  
180 all lumbar levels L1-S1 including non-symptomatic and non-operative levels. A scatter plot of  
181 amyloid load and lumbar LF burden is presented in Figure 4B. Amyloid load was shown to be  
182 positively correlated with lumbar LF burden, achieving statistical significance ( $R = 0.383$ ,  $p =$   
183  $0.0279$ ).

184

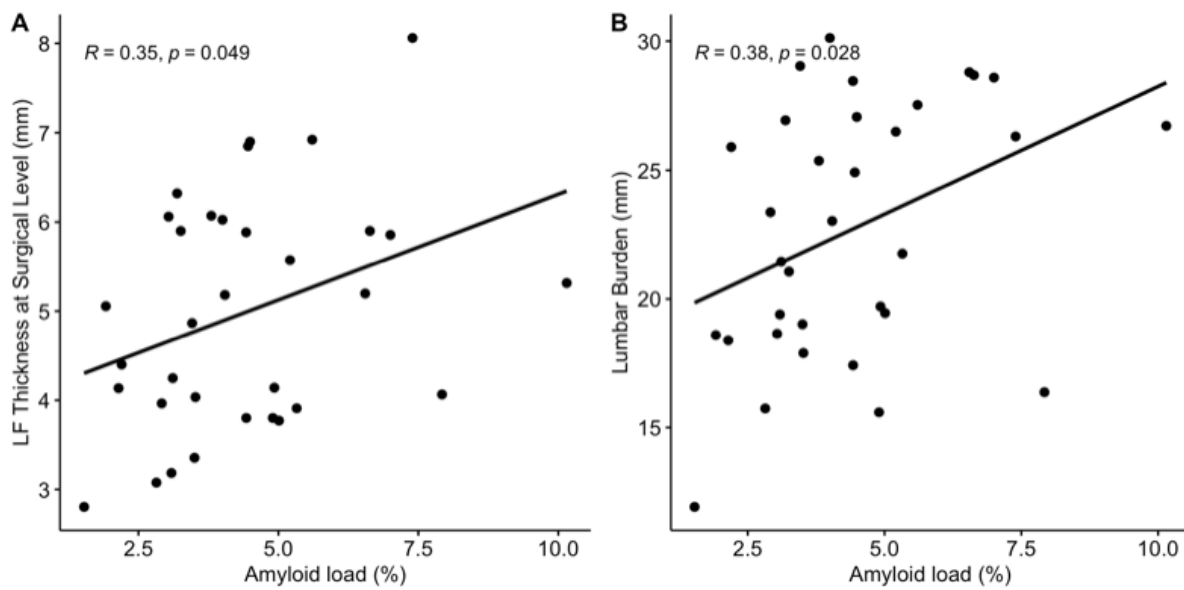

185

186 **Figure 4. Scatter plots of amyloid load with surgical level LF thickness and lumbar LF**

187 **burden.** A) Amyloid load versus surgical level of LF thickness, positive correlation with p-value

188 = 0.049. B). Amyloid load versus lumbar LF burden, positive correlation with p-value = 0.028.

189

## 190 DISCUSSION

191 There is a positive and dose-dependent relationship between amyloid load and LF thickness at  
192 the surgical level as well as between amyloid load and lumbar LF burden. Lumbar LF burden is  
193 the sum of the LF thicknesses at all lumbar levels, and this positive association implies that the  
194 average LF thickness at each level is significantly correlated with amyloid load. These findings  
195 support a previous study by Yanagisawa et al. that analyzed 43 patients, finding positive  
196 correlation between amyloid load and lumbar LF thickness ( $r = 0.54$ , p-value  $< 0.0005$ ).<sup>8</sup> A  
197 limitation of that study was the methodology for obtaining amyloid deposit measurements, only  
198 reporting it was obtained with ImageJ without further detail. Other publications assessing  
199 amyloid load through computational methods have used the color thresholding function in  
200 ImageJ, which we have previously shown to be suboptimal.<sup>11</sup> Our method utilizes powerful and

201 precise machine learning quantification to measure amyloid load, which outperforms color  
202 thresholding. While the results shown in this paper are statistically significant, our p-values were  
203 not as low as those in the study by Yanagisawa et al. However, these p-values cannot be  
204 compared to each other as these are completely different studies. Furthermore, there may be a  
205 more complex relationship between the amount of amyloid and LF thickness in patients  
206 harboring ATTRwt in their LF and perhaps a larger sample size is needed for increased statistical  
207 power to better assess this relationship.

208  
209 Our results suggest that amyloid may not simply be a bystander to LF thickening, but rather a  
210 direct contributor in a dose-dependent manner. The mechanism by which LF thickening occurs  
211 has yet to be fully understood. Currently, studies have identified TGF- $\beta$  as part of the pathway in  
212 LF thickening, responsible for transforming fibroblasts to myofibroblasts and leading to  
213 increased collagen production.<sup>17</sup> IL-6 is another implicated biomarker, associated with increased  
214 fibrosis and expression of collagen type I and III.<sup>18</sup> TGF- $\beta$  in the presence of IL-6 has been  
215 shown to induce an inflammatory response.<sup>19</sup> Specifically, transforming growth factor beta  
216 (TGF- $\beta$ ) and interleukin 6 (IL-6) promote the differentiation of Th17 cells, leading to cytokine  
217 release. Additionally, the misfolding of amyloid itself could be another mechanism, with the  
218 normally buried hydrophobic residues now exposed to the environment.<sup>20</sup> Future studies should  
219 focus on biochemical pathways of amyloid load within the ligamentum flavum in order to  
220 understand how amyloid specifically leads to LF thickening.

221  
222 The study has several limitations. The presence of ATTRwt in one specimen was used to infer  
223 positivity at all levels, as the presence of amyloid cannot be confirmed at asymptomatic levels

224 without further resection. There may also be sampling bias due to what the surgeon sends as a LF  
225 specimen. Some patients may have had previous spinal decompression surgeries at other levels  
226 prior to this study, underestimating the lumbar LF burden. Another limitation could be using a  
227 Congo red stain from a single block to extrapolate amyloid density throughout the specimen, as  
228 there may be variation in amyloid density in different blocks from the same specimen. Lastly,  
229 this study only includes patients undergoing decompressive surgery. Thus, there may be collider  
230 bias, also known as index event bias, which is when studies select patients based on an index  
231 event, in this case spinal surgery.<sup>21</sup> This type of bias tends to shift study results towards the null,  
232 underestimating contributions as may be seen in this study.

233

234 In addition to understanding biochemical pathways, future studies may explore the potential of  
235 drug therapy for halting the progression of LF thickening in patients with amyloid. For ATTRwt,  
236 several therapies exist to reduce its production, stabilize ATTRwt, and remove fibrils, studied in  
237 the context of cardiac amyloidosis.<sup>22</sup> Tafamidis is a well-known example that is FDA-approved  
238 for cardiomyopathy of wild-type or hereditary TTR-mediated amyloidosis.<sup>23</sup> Although not yet  
239 studied in the context of LF thickening, tafamidis may potentially help reduce the buildup of  
240 ATTRwt in the LF and slow its thickening. This study lays the foundation for possible  
241 intervention studies such as a longitudinal study of patients on tafamidis, or even a clinical trial.

242

## 243 **CONCLUSIONS**

244 The data from this study suggest that amyloid load is positively correlated with LF thickness in a  
245 dose-dependent manner in patients with ATTRwt. Further studies may investigate the

246 biochemical pathways involved in this process, as well as potential drug targets for reducing LF  
247 thickening.

248

249 **Acknowledgments:** We would also like to thank Joanna R. O'Brien from the Tufts Pathology  
250 department for retrieving and scanning the histological slides of ligamentum flavum.

251

252 **Sources of support:** Andy Y. Wang was supported by the National Center for Advancing  
253 Translational Sciences, National Institutes of Health, Award Number TL1TR002546. The  
254 content is solely the responsibility of the authors and does not necessarily represent the official  
255 views of the NIH.

256

257 **Conflict of interest:** All authors report no conflict of interest.

258

## 259 **References**

- 260 1. Sun C, Zhang H, Wang X, Liu X. Ligamentum flavum fibrosis and hypertrophy:  
261 Molecular pathways, cellular mechanisms, and future directions. *FASEB J*. Aug 2020;34(8):9854-  
262 9868. doi:10.1096/fj.202000635R
- 263 2. Sueyoshi T, Ueda M, Jono H, et al. Wild-type transthyretin-derived amyloidosis in  
264 various ligaments and tendons. *Hum Pathol*. Sep 2011;42(9):1259-64.  
265 doi:10.1016/j.humpath.2010.11.017
- 266 3. Westermark P, Westermark GT, Suhr OB, Berg S. Transthyretin-derived amyloidosis:  
267 probably a common cause of lumbar spinal stenosis. *Ups J Med Sci*. Aug 2014;119(3):223-8.  
268 doi:10.3109/03009734.2014.895786

- 269 4. Siddiqi OK, Ruberg FL. Cardiac amyloidosis: An update on pathophysiology, diagnosis,  
270 and treatment. *Trends Cardiovasc Med*. Jan 2018;28(1):10-21. doi:10.1016/j.tcm.2017.07.004
- 271 5. Godara A, Riesenburger RI, Zhang DX, et al. Association between spinal stenosis and  
272 wild-type ATTR amyloidosis. *Amyloid*. Jul 15 2021;1-8. doi:10.1080/13506129.2021.1950681
- 273 6. Aus dem Siepen F, Hein S, Prestel S, et al. Carpal tunnel syndrome and spinal canal  
274 stenosis: harbingers of transthyretin amyloid cardiomyopathy? *Clin Res Cardiol*. Dec  
275 2019;108(12):1324-1330. doi:10.1007/s00392-019-01467-1
- 276 7. Eldhagen P, Berg S, Lund LH, Sorensson P, Suhr OB, Westermark P. Transthyretin  
277 amyloid deposits in lumbar spinal stenosis and assessment of signs of systemic amyloidosis. *J*  
278 *Intern Med*. Jun 2021;289(6):895-905. doi:10.1111/joim.13222
- 279 8. Yanagisawa A, Ueda M, Sueyoshi T, et al. Amyloid deposits derived from transthyretin  
280 in the ligamentum flavum as related to lumbar spinal canal stenosis. *Mod Pathol*. Feb  
281 2015;28(2):201-7. doi:10.1038/modpathol.2014.102
- 282 9. George KM, Hernandez NS, Breton J, et al. Increased thickness of lumbar spine  
283 ligamentum flavum in wild-type transthyretin amyloidosis. *J Clin Neurosci*. Feb 2021;84:33-37.  
284 doi:10.1016/j.jocn.2020.11.029
- 285 10. George KM, Hernandez NS, Breton J, et al. Lumbar ligamentum flavum burden:  
286 Evaluating the role of ATTRwt amyloid deposition in ligamentum flavum thickness at all lumbar  
287 levels. *Clin Neurol Neurosurg*. Jul 2021;206:106708. doi:10.1016/j.clineuro.2021.106708
- 288 11. Wang AY, Sharma V, Saini H, et al. Machine Learning Quantification of Amyloid  
289 Deposits in Histological Images of Ligamentum Flavum. *Journal of Pathology Informatics*.  
290 2022/01/01/ 2022;13:100013. doi:<https://doi.org/10.1016/j.jpi.2022.100013>

- 291 12. Vrana JA, Gamez JD, Madden BJ, Theis JD, Bergen HR, 3rd, Dogan A. Classification of  
292 amyloidosis by laser microdissection and mass spectrometry-based proteomic analysis in clinical  
293 biopsy specimens. *Blood*. Dec 3 2009;114(24):4957-9. doi:10.1182/blood-2009-07-230722
- 294 13. Sakamaki T, Sairyō K, Sakai T, Tamura T, Okada Y, Mikami H. Measurements of  
295 ligamentum flavum thickening at lumbar spine using MRI. *Arch Orthop Trauma Surg*. Oct  
296 2009;129(10):1415-9. doi:10.1007/s00402-009-0849-1
- 297 14. Shrout PE, Fleiss JL. Intraclass correlations: uses in assessing rater reliability. *Psychol*  
298 *Bull*. Mar 1979;86(2):420-8. doi:10.1037//0033-2909.86.2.420
- 299 15. Walter SD, Eliasziw M, Donner A. Sample size and optimal designs for reliability  
300 studies. *Stat Med*. Jan 15 1998;17(1):101-10. doi:10.1002/(sici)1097-  
301 0258(19980115)17:1<101::aid-sim727>3.0.co;2-e
- 302 16. Zou GY. Sample size formulas for estimating intraclass correlation coefficients with  
303 precision and assurance. *Stat Med*. Dec 20 2012;31(29):3972-81. doi:10.1002/sim.5466
- 304 17. Hur JW, Bae T, Ye S, et al. Myofibroblast in the ligamentum flavum hypertrophic  
305 activity. *Eur Spine J*. Aug 2017;26(8):2021-2030. doi:10.1007/s00586-017-4981-2
- 306 18. Sun C, Wang Z, Tian JW, Wang YH. Leptin-induced inflammation by activating IL-6  
307 expression contributes to the fibrosis and hypertrophy of ligamentum flavum in lumbar spinal  
308 canal stenosis. *Biosci Rep*. Apr 27 2018;38(2)doi:10.1042/bsr20171214
- 309 19. Prud'homme GJ. Pathobiology of transforming growth factor beta in cancer, fibrosis and  
310 immunologic disease, and therapeutic considerations. *Lab Invest*. Nov 2007;87(11):1077-91.  
311 doi:10.1038/labinvest.3700669
- 312 20. Kim MJ, Baek D, Truong L, Ro JY. Pathologic Findings of Amyloidosis: Recent  
313 Advances. *IntechOpen*. 2019;doi:10.5772/intechopen.84268



- 314 21. Dahabreh IJ, Kent DM. Index event bias as an explanation for the paradoxes of  
315 recurrence risk research. *Jama*. Feb 23 2011;305(8):822-3. doi:10.1001/jama.2011.163
- 316 22. Ruberg FL, Grogan M, Hanna M, Kelly JW, Maurer MS. Transthyretin Amyloid  
317 Cardiomyopathy: JACC State-of-the-Art Review. *J Am Coll Cardiol*. Jun 11 2019;73(22):2872-  
318 2891. doi:10.1016/j.jacc.2019.04.003
- 319 23. Park J, Egolum U, Parker S, Andrews E, Ombengi D, Ling H. Tafamidis: A First-in-  
320 Class Transthyretin Stabilizer for Transthyretin Amyloid Cardiomyopathy. *Ann Pharmacother*.  
321 May 2020;54(5):470-477. doi:10.1177/1060028019888489
- 322
